# Supplementary material for: SERS based Y-shaped aptasensor for early diagnosis of acute kidney injury
Source: Royal Society of Chemistry journal article supplement (doi:10.1039/d2ra02813a), 2022-01-01
Supplement: d2ra02813a1.pdf [file d2ra02813a1.pdf]

## **SERS based Y-shaped aptasensor for early diagnosis of acute kidney injury**

Dan Li,<sup>‡ab</sup> Linlu Zhao,<sup>‡bc</sup> Jin Qian,<sup>bc</sup> Heng Liu,<sup>bc</sup> Ziyi Cheng,<sup>\*bc</sup> Jinmao You<sup>\*a</sup> and Fabiao Yu<sup>\*bc</sup>

<sup>a</sup>Key Laboratory of Life-Organic Analysis of Shandong Province, School of Chemistry and Chemical Engineering, Qufu Normal University, Qufu, 273165, PR China.

<sup>b</sup>Laboratory of Neurology, The First Affiliated Hospital of Hainan Medical University, Hainan Medical University, Haikou 571199, China

<sup>c</sup>Key Laboratory of Emergency and Trauma, Ministry of Education, College of Emergency and Trauma, Hainan Medical University, Haikou 571199, China.

\* E-mail: chengziyi@hainmc.edu.cn;

jmyou6304@163.com;

yufabiao@hainmc.edu.cn

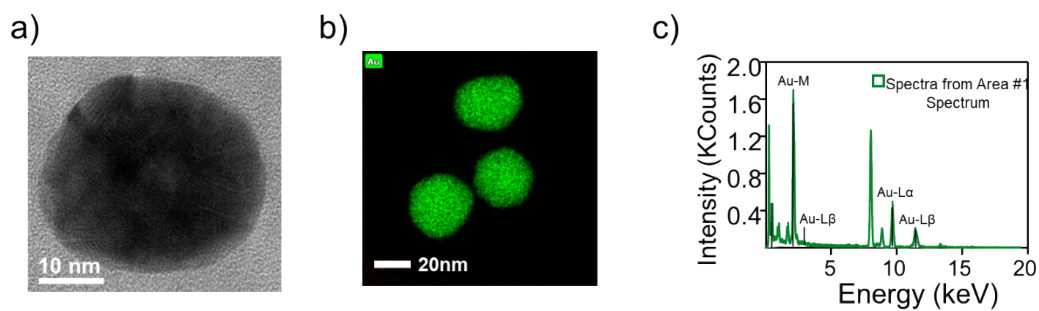

**Figure S1** a) HR-TEM image of AuNPs. b) TEM-EDS mapping of AuNPs. c) EDS spectrum of AuNPs.

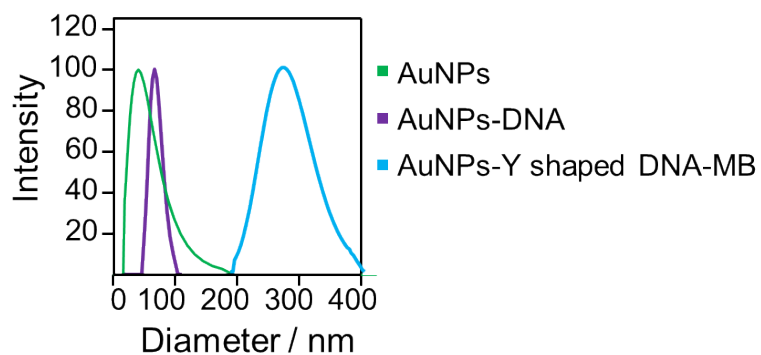

**Figure S2** DLS data of AuNPs (green line), AuNPs-DNA (purple line) and AuNPs-Y shaped DNA-MB (blue line).

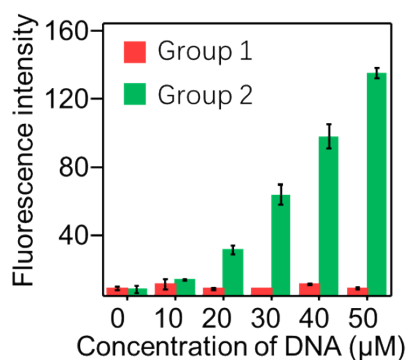

**Figure S3** Fluorescent intensity of safe green nucleic acid dye in two groups of biotinylated DNA conjugated streptavidin-coated magnetic beads with various concentrations of biotinylated probe DNA<sub>2</sub> from 0 μM to 50 μM.  $\lambda_{\text{ex}} = 254 \text{ nm}$ ,  $\lambda_{\text{em}} = 520 \text{ nm}$ .

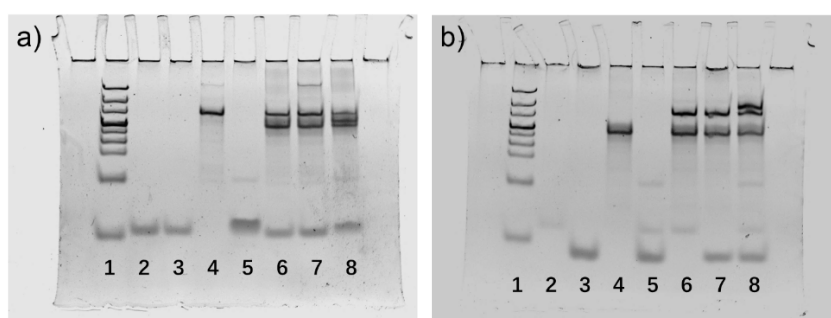

**Figure S4** Electrophoresis characteristics of the Y-shaped aptamer. a) Formation of Y-shaped aptasensor of NGAL (Lane 1 - Lane 8). Lane 1: marker, Lane 2: 1.0  $\mu\text{M}$  Probe<sub>1</sub>, Lane3: 1.0  $\mu\text{M}$  Probe<sub>2</sub>, Lane 4: 0.3  $\mu\text{M}$  NGAL aptamer, Lane 5: 1.0  $\mu\text{M}$  Probe<sub>1</sub>+1.0  $\mu\text{M}$  Probe<sub>2</sub>, Lane 6: 1.0  $\mu\text{M}$  Probe<sub>1</sub> + 0.3  $\mu\text{M}$  NGAL aptamer, Lane 7: 1.0  $\mu\text{M}$  Probe<sub>2</sub> + 0.3  $\mu\text{M}$  NGAL aptamer, Lane 8: 1.0  $\mu\text{M}$  Probe<sub>1</sub> + 1.0  $\mu\text{M}$  Probe<sub>2</sub> + 0.3  $\mu\text{M}$  NGAL aptamer. b) Formation of Y-shaped aptasensor of Cys C (Lane 1 - Lane 8). Lane 1: marker, Lane 2: 1.0  $\mu\text{M}$  Probe<sub>1</sub>, Lane3: 1.0  $\mu\text{M}$  Probe<sub>2</sub>, Lane 4: 0.3  $\mu\text{M}$  Cys C aptamer, Lane 5: 1.0  $\mu\text{M}$  Probe<sub>1</sub>+1.0  $\mu\text{M}$  Probe<sub>2</sub>, Lane 6: 1.0  $\mu\text{M}$  Probe<sub>1</sub> + 0.3  $\mu\text{M}$  Cys C aptamer, Lane 7: 1.0  $\mu\text{M}$  Probe<sub>2</sub> + 0.3  $\mu\text{M}$  Cys C aptamer, Lane 8: 1.0  $\mu\text{M}$  Probe<sub>1</sub> + 1.0  $\mu\text{M}$  Probe<sub>2</sub> + 0.3  $\mu\text{M}$  Cys C aptamer.

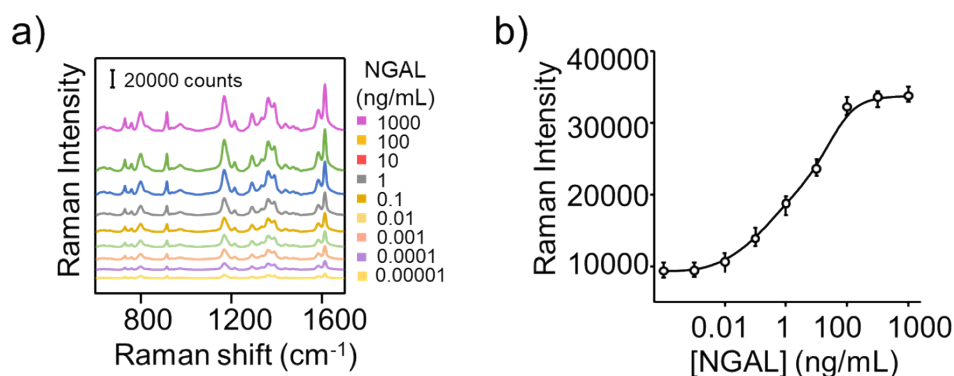

**Figure S5** Standard working curve for NGAL. a) SERS spectra of AuNPs-Y shaped DNA-MB (NGAL) after incubation at various concentrations, respectively. b) SERS signals at 1618  $\text{cm}^{-1}$  in the spectra of a.

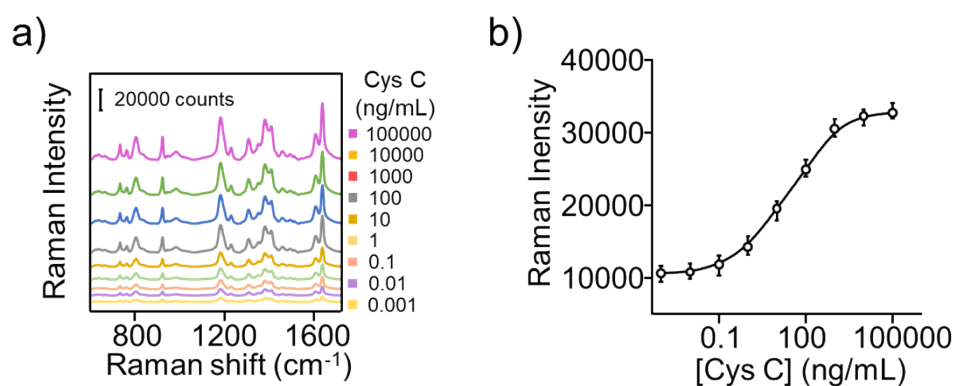

**Figure S6** Standard working curve for Cys C. a) SERS spectra of AuNPs-Y shaped DNA-MB (Cys C) after incubation at various concentrations, respectively. b) SERS signals at 1618  $\text{cm}^{-1}$  in the spectra of a.

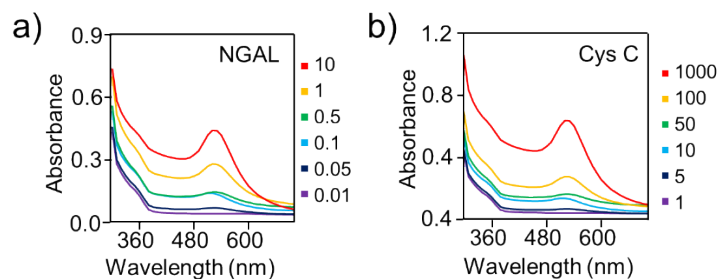

**Figure S7** a, b) UV-vis spectra of the probe supernatant after adding each target protein with different concentration and incubating, respectively.

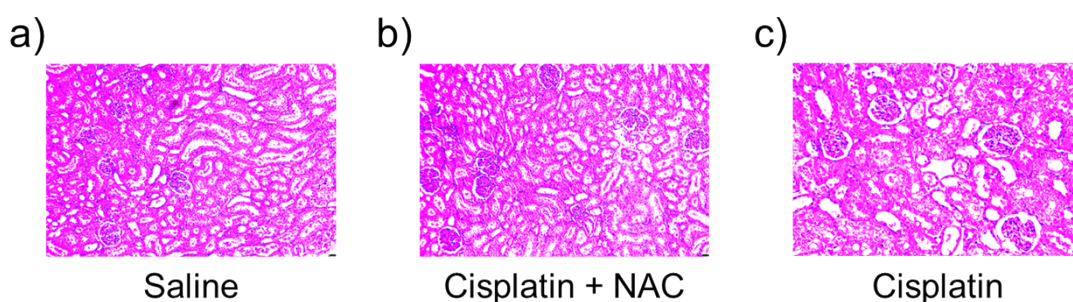

**Figure S8** Photographs of H&E staining of paraffin-embedded sections of rat kidneys after drug treatment. a) Saline injection at 24 h. b) Cisplatin + NAC injection at 24 h. c) Cisplatin injection at 24 h. Scale bar, 50  $\mu$ m.

**Table S1** Sequence list

|               |                                                                                                        |                                                                      |
|---------------|--------------------------------------------------------------------------------------------------------|----------------------------------------------------------------------|
| NGAL aptamer  | (5'-<br>)AGCAGCACAGAGGTCAGATGGCGCTGGATAGCAAGATCACGTTATCATC<br>GTAAACCCTATGCGTGCTACCGTGAA (-3')         |                                                                      |
| NGAL          | Probe <sub>1</sub>                                                                                     | (5'-) CTGTGACTGCTGCT (-3') [-(CH <sub>2</sub> ) <sub>6</sub> -SH-3'] |
|               | Probe <sub>2</sub>                                                                                     | (5'-) ACCTCGTGTCACAG (-3') [-biotin]                                 |
| Cys-C aptamer | (5'-<br>)CCTAACCGATATCACACTCACGAACTGTCGGAACCTCGGGCCAAATGGAC<br>GAGCGACCATTGGTTGTTTCGTCATTGGAGTATC(-3') |                                                                      |
| Cys-C         | Probe <sub>1</sub>                                                                                     | (5'-) CTGTGACGGTTAGG (-3') [-(CH <sub>2</sub> ) <sub>6</sub> -SH-3'] |
|               | Probe <sub>2</sub>                                                                                     | (5'-) TGATATCGTCACAG (-3') [-biotin]                                 |

**Table S2** Comparison of the proposed method and other reported methods.

|   | Assay                          | Biomarker | Range<br>(ng/mL) | LOD<br>(ng/mL) | Assay<br>Time | Dual<br>assay | Ref.        |
|---|--------------------------------|-----------|------------------|----------------|---------------|---------------|-------------|
| 1 | SERS-based Y-shaped aptasensor | NGAL      | 0.01-10          | 0.052          | 5 mins        | Yes           | This method |
|   |                                | Cys C     | 1-1000           | 0.34           |               |               |             |
| 2 | ELISA                          | NGAL      | 0.25-2           | 0.032          | 4 h           | No            | [1]         |
|   |                                | Cys C     | 0.5-31.3         | 0.5            |               |               | [2]         |
| 3 | RIA                            | NGAL      | 4-25             | 4              | 3.5 h         | No            | [3]         |
|   |                                | Cys C     | 0.125-62.5       | 0.125          | ND            |               | [4]         |
| 4 | UPT-LFA                        | NGAL      | 7.68-1000        | 7.68           | 30 mins       | No            | [5]         |
| 5 | LC-MS/MS                       | Cys C     | 250-15000        | 30             | 7-8 mins      | No            | [6]         |
| 6 | fluorescence-based immunoassay | NGAL      | 60-1300          | 60             | 20 mins       | No            | [7]         |
| 7 | bFQICA                         | Cys C     | 0.0-100          | 0.69           | 15 mins       | No            | [8]         |

ELISA: enzyme-linked immunosorbent assay; RIA: radioimmunoassay; UPT-LFA: UCP technology-based lateral flow assay; LC-MS/MS: Liquid chromatography-tandem mass spectrometry; bFQICA: background fluorescence quenching immune chromatographic assay.

## References

1. L. Kjeldsen, C. Koch, K. Arnljots and N. Borregaard, *Journal of immunological methods*, 1996, **198**, 155-164.
2. R. Jiang, C. Xu, X. Zhou, T. Wang and G. Yao, *Journal of Translational Medicine*, 2014, **12**, 1-8.
3. S. Xu, C. Petersson, M. Carlson and P. Venge, *Journal of immunological methods*, 1994, **171**, 245-252.
4. A. Collé, C. Tavera, P. Laurent, J. Leung-Tack and J. P. Girolami, *Journal of immunoassay*, 1990, **11**, 199-214.
5. L. Lei, J. Zhu, G. Xia, H. Feng, H. Zhang and Y. Han, *Talanta*, 2017, **162**, 339-344.
6. Y. Li, H. Ji, L. Shen, X. Shi and J. Wang, *Analytical biochemistry*, 2019, **587**, 113451.
7. C. L. Dent, Q. Ma, S. Dastrala, M. Bennett, M. M. Mitsnefes, J. Barasch and P. Devarajan, *Critical care*, 2007, **11**, 1-8.
8. B. Li, J. Song, J. Chen, L. Ma, X. Li, J. Li and M. Guan, *Analytical Letters*, 2019, **52**, 1340-1351.
